# Supplementary material for: Association between Incidental Pelvic Inflammation and Aggressive Prostate Cancer
Source: MDPI journal article supplement (doi:10.3390/cancers14112734), 2022-05-31
Supplement: s1 [file s1]

## Supplementary Methods

### *Statistical Analysis*

Multivariable logistic prediction models were developed to assess the role of pelvic inflammation in providing the individual probability of AP and Cox regression for prediction of BCR, estimated based on patient and tumor characteristics.

The prediction model in Figure 1 included PSA ( $\leq 10$  ng/mL vs  $>10.1$  ng/mL), pelvic inflammation score (0 & 1 was grouped as low and 2, 3 was grouped as high), mpMRI findings (PI-RADS score of 0, 1, 2, 3 was grouped against score of 4, 5), biopsy Gleason grade group (1, 2 was grouped against score of 3, 4, 5), final pathology staging (pT2 vs. pT3) and pelvic inflammation with hernia mesh grouped (0, 1 (no inflammation w/o hernia mesh) vs 2 (inflammation without hernia mesh) vs 3 (inflammation with hernia mesh)).

The receiving operator characteristic (ROC) curve was used to estimate how strongly pelvic inflammation can predict Adverse Pathology (AP) at final pathology in univariate and multivariate logistic regression analyses. A nomogram was built based on the coefficients of logit function. Decision Curve Analyses (DCA) was used to evaluate the performance of the prediction model. Internal Validation was performed with a calibration plot to show agreement between predicted probabilities and observed probabilities. For the calibration plots, patients were divided into deciles based on predicted event probability and in each decile averaged probability of predicted events was compared to actual rate of events.

All tests were two-tailed with  $p$ -value of 0.05 considered statistically significant. SAS 9.4 software (SAS Institute Inc., Cary, North Carolina, USA) and STATA v14 (Stata Corp LLP, College Station, Texas, USA) were used for all statistical analyses.

### *Microarray data analysis: Transcriptome Analysis*

The Decipher assay using Affymetrix platform [14–16] is optimized for use with small amounts of RNA extracted from archived FFPE samples and is the only clinical-grade transcriptome assay for prostate cancer. The Decipher assay was run at the Decipher Biosciences laboratory, located in San Diego, CA, which is certified under the Clinical Laboratory Improvement Amendment (CLIA; 05D2055897), accredited by the College of American Pathologists (CAP, 8859006), and licensed by the New York State Department of Health (NYSDOH, 9018) to run the Decipher FFPE assay.

Multivariable logistic regression was used to identify genes differentially expressed between low and high pelvic inflammation groups.

### *Primary Prostate cancer cell culture*

The procedure to isolate primary prostate cancer cells is compliant with federal regulations for use of clinical biospecimens (45 CFR 46.102(f)). At tissue grossing  $\sim 4$  mm<sup>3</sup> tissues corresponding to adjacent normal and/or tumor area were freshly dissected by a resident pathologist and de-identified tissue specimens were transported in MACS tissue storage solution (Miltenyi Biotech; catalogue #130-100-008) supplemented with 10  $\mu$ M Rock Inhibitor (Y-27632; Selleck Chemicals; catalogue #S1049), to the laboratory. Tissues were washed twice in DMEM and minced into smaller 1 mm<sup>3</sup> pieces. The cell suspension was prepared using a tumor dissociation kit (Miltenyi Biotech; Catalogue #130-096-334) and gentle-MACS dissociator (program 37C\_h\_TDK\_2) for 60 min. The cell suspension was filtered using a 70  $\mu$ m strainer and collected by centrifugation  $430 \times g$  for 10 min. These cells were then counted and plated for invasion and migration assays.

### *Invasion and migration assays*

Inflamed or normal peritoneum was processed under a laminar flow hood using a sterile technique and rinsed twice in RPM1 medium supplemented with 5% FBS. Tissues were subdivided into approximately 1 mm<sup>3</sup> pieces and placed in a 24-well plate on pre-soaked dental sponges (Novartis #96002) (2–3 pieces per sponge) into 0.5 mL culture media. Plates were placed in an incubator at 37 °C and 5% CO<sub>2</sub>. The supernatant collected

after 24 h was used as a chemoattractant for invasion and migration assays. The assays were performed as described previously [17] following the manufacturer's instructions.

#### *Quantitative RT PCR*

Inflamed and non-inflamed peritoneum was collected during surgery from patients who consented to PPHS/IRB study (Mount Sinai # GCO 14-0318). Total RNA was prepared using Purelink RNA mini kit (Invitrogen) and reverse transcribed using the iscript Advanced cDNA synthesis reagent's following the manufacturer's instructions (BioRad Laboratories, USA). Briefly, tissues were homogenized in lysis buffer to ensure RNase-free lysis and purified through a mini spin column. Following multiple washes, total RNA was collected into a final volume of 30  $\mu$ L. Total RNA was measured using nano-drop and 260/230 and 260/280 ratios were considered a measure of quality. cDNA was prepared using an iscript cDNA synthesis kit (BioRad Laboratories, USA). Quantitative real-time PCR was performed using SSO-Advanced Universal SYBR Green supermix (BioRad Laboratories, USA) and was analyzed on the CFX384 Touch real-time PCR system (BioRad Laboratories). Transcript levels were measured using the Delta-Ct method after normalization to housekeeping genes (race paper)

#### *Olink Assay*

Serum cytokines were analyzed using the Olink multiplex assay platform (Immunology Panel, Olink Bioscience), according to the manufacturer's instructions.

Briefly, an incubation master mix containing pairs of oligonucleotide-labeled antibodies to each protein was added to the samples and incubated for 16 h at 4 °C. Each protein was targeted with two different epitope-specific antibodies increasing the specificity of the assay. The presence of the target protein in the sample brought the partner probes in proximity, allowing the formation of a double-strand oligonucleotide polymerase chain reaction (PCR) target. On the following day, the extension master mix in the sample initiated the specific target sequences to be detected and generated amplicons using PCR in 96 well plates. For the detection of the specific protein, a Dynamic array integrated fluidic Circuit (IFC) 96  $\times$  96 chip was primed, loaded with 92 protein-specific primers, and mixed with sample amplicons including three inter-plate controls (IPS) and three negative controls (NC). Real-time microfluidic qPCR was performed in Biomark (Fluidigm, San Francisco, CA) for the target protein quantification.

#### *Analysis of O-Link data*

Data analysis was done using real-time PCR analysis software ( $\Delta\Delta$ Ct method [doi:10/c689hx] and NPX (Normalized Protein Expression) manager. For data normalization, internal controls were used in each sample, inter-plate control (IPC) and negative controls, and a correction factor was calculated by Olink from the negative controls. This produces NPX values that are proportional to log<sub>2</sub> of the protein concentration. Clustergrammer [23] was used to visualize the expression of the target proteins.

In multivariate analysis, the genes were grouped according to their pathways to create corresponding models when using genes from that pathway alone, and in pooled approach where all genes were grouped together in the joint multivariate model. Genes were selected using the Maximum Relevance Minimum Redundancy (mRMR) technique to select a subset of best genes having the most correlation with class characterization (relevance), and the smallest correlation between each other (redundancy). Groups of genes were compared with the F-test of corresponding logistic regression models to see if a more complex model provided a significantly better fit to the observations than the corresponding model with fewer parameters. The ability of the models to predict inflammation was evaluated by the ROC curve analysis using AUC values. All statistical calculations were performed with Rstudio 1.1.456 (Rstudio Inc.).

**Table S1.** Subgroup multivariable analysis predicting adverse pathology considering pelvic inflammation without hernia mesh in 1858 cases.

| Covariates.                   | OR (CI 95%)             | p Value |
|-------------------------------|-------------------------|---------|
| PSA (ng/mL)                   | 2.376 (1.774, 3.183)    | <0.0001 |
| Biopsy Gleason                |                         |         |
| 1,2                           | Ref                     |         |
| 3                             | 4.941 (3.801, 6.423)    | 0.5929  |
| 4,5                           | 20.981 (14.801, 29.740) | <.0001  |
| herniamesh_pelvicinflammation |                         |         |
| absent                        | Ref                     |         |
| present                       | 1.320 (1.033, 1.685)    | 0.0262  |

**Table S2.** Subgroup multivariable analysis predicting adverse pathology in high Biopsy Gleason group (3,4,5) in 881 cases.

| Covariates          | Odds Ratio (95% CI) | p Value |
|---------------------|---------------------|---------|
| PSA                 | 1.90 (1.28,2.82)    | 0.0014  |
| Pelvic Inflammation | 1.45 (1.07, 1.99)   | 0.0185  |
| ECE on MRI          | 2.60 (1.85, 3.67)   | <0.0001 |

**Table S3.** Univariable and Multivariable analysis predicting Adverse Pathology considering pelvic inflammation.

| Univariable analysis             |                       |         | Multivariable Analysis |         |
|----------------------------------|-----------------------|---------|------------------------|---------|
| Covariate                        | Odds ratio ((5% CI)   | p Value | Odds ratio ((5% CI)    | p Value |
| Age (years)                      | 1.06 (1.05, 1.07)     | <0.0001 | 1.06(1.05, 1.08)       | <0.0001 |
| PSA (ng/mL)                      |                       |         |                        |         |
| <10 ng/mL                        | Ref                   |         | Ref                    |         |
| >10.1 ng/mL                      | 2.87 (2.27, 3.62)     | <0.0001 | 3.11 (2.43, 3.98)      | <0.0001 |
| Race                             |                       |         |                        |         |
| African American                 | 0.69 (0.47, 1.03)     | 0.0108  |                        |         |
| Caucasian                        | 0.97 (0.71, 1.32)     | 0.6654  |                        |         |
| Asian                            | 1.15 (0.72, 1.85)     | 0.1778  |                        |         |
| Others                           | Ref                   |         |                        |         |
| MRI Prostate Volume              | 0.99 (0.99, 1.00)     | 0.2762  | 0.99 (0.99, 0.99)      | <0.0001 |
| Pelvic Inflammation              |                       |         |                        |         |
| Low (0,1)                        | Ref                   |         | Ref                    |         |
| High (2,3)                       | 1.69 (1.41, 2.02)     | <0.0001 | 1.51 (1.25, 1.82)      | <0.0001 |
| Herniamesh_pelvicinflam          |                       |         |                        |         |
| No inflammation w/o hernia mesh  | Ref                   |         |                        |         |
| Inflammation without hernia mesh | 1.81 (1.48, 2.22)     | 0.0002  |                        |         |
| Inflammation with hernia mesh    | 1.45 (1.10, 1.91)     | 0.5911  |                        |         |
| MRI ECE                          |                       |         |                        |         |
| Absent                           | Ref                   |         |                        |         |
| present                          | 2.98 (2.44, 3.64)     | <0.0001 |                        |         |
| MRI PI-RADS                      |                       | <0.0001 |                        |         |
| 1/2/3                            | Ref                   |         |                        |         |
| 4/5                              | 2.43 (1.95, 3.03)     |         |                        |         |
| Biopsy Gleason Grade Group       |                       | <0.0001 |                        |         |
| 1/2                              | Ref                   |         |                        |         |
| 3/4/5                            | 10.185 (8.272, 12.53) |         |                        |         |

**Table S4.** Baseline characteristics between patients with or without Biochemical Recurrence and PSA persistence features.

| <b>Covariates</b>          | <b>BCR Absent (n= 1719)</b> | <b>BCR present (n= 278)</b> | <b>p Value</b> |
|----------------------------|-----------------------------|-----------------------------|----------------|
| Age (years)                | 63.0 (57.1, 68.0)           | 65.0 (60.2,69.2)            | <0.0001        |
| PSA (ng/mL)                | 5.5 (4.4, 8.2)              | 8.5 (5.6, 16.0)             | <0.0001        |
| MRI prostate Volume (mL)   | 37 (28.0, 52.0)             | 38 (27.0, 54.0)             | 0.7531         |
| Clinical Stage             |                             |                             | <0.0001        |
| T1                         | 817 (6675%)                 | 115(54.50%)                 |                |
| T2                         | 393 (32.11%)                | 82 (38.86%)                 |                |
| T3                         | 14 (1.14%)                  | 14 (6.64%)                  |                |
| Pelvic Inflammation        |                             |                             | 0.2687         |
| 0 (absent)                 | 426 (24.78%)                | 76 (27.34%)                 |                |
| 1 (low)                    | 611 (35.54%)                | 83 (29.85%)                 |                |
| 2 (moderate)               | 327 (19.02%)                | 53 (19.06%)                 |                |
| 3 (high)                   | 355 (20.65%)                | 66 (23.74%)                 |                |
| Race                       |                             |                             | 0.1168         |
| African American           | 189 (10.99%)                | 43 (16.94%)                 |                |
| Caucasian                  | 1282 (74.58%)               | 190 (68.35%)                |                |
| Asian                      | 92 (5.35%)                  | 17 (6.12%)                  |                |
| other                      | 156 (9.08%)                 | 28 (10.07%)                 |                |
| MRI ECE                    |                             |                             | <0.0001        |
| Absent                     | 1263 (72.65%)               | 136 (48.92%)                |                |
| Present                    | 456 (26.53%)                | 142 (51.08%)                |                |
| MRI_PIRADS                 |                             |                             | <0.0001        |
| 0                          | 44 (2.56%)                  | 4 (1.44%)                   |                |
| 1                          | 83 (4.83%)                  | 18 (6.47%)                  |                |
| 2                          | 177 (10.30%)                | 5 (1.80%)                   |                |
| 3                          | 146 (8.49%)                 | 10 (3.6%)                   |                |
| 4                          | 773 (44.97%)                | 74 (26.62%)                 |                |
| 5                          | 496 (28.85%)                | 167 (60.07%)                |                |
| Biopsy Gleason Grade       |                             |                             | <0.0001        |
| 3+3                        | 385 (22.40%)                | 16 (5.76%)                  |                |
| 3+4                        | 706 (41.07%)                | 52 (18.71%)                 |                |
| 4+3                        | 323 (18.79%)                | 74 (26.62%)                 |                |
| 4+4/3+5/5+3                | 192 (11.17%)                | 73 (26.26%)                 |                |
| 4+5/5+4/5+5                | 113 (6.57%)                 | 63 (22.66%)                 |                |
| Path Gleason grade Group   |                             |                             | <0.0001        |
| 3+3                        | 214 (12.45%)                | 3 (1.08%)                   |                |
| 3+4                        | 1024 (59.57%)               | 66 (24.79%)                 |                |
| 4+3                        | 359 (20.88%)                | 125 (44.96%)                |                |
| 4+4/3+5/5+3                | 34 (1.98%)                  | 18 (6.47%)                  |                |
| 4+5/5+4/5+5                | 88 (5.12%)                  | 66 (23.74%)                 |                |
| Pathology EPE              |                             |                             | <0.0001        |
| absent                     | 1403 (81.62%)               | 127 (45.68%)                |                |
| present                    | 316 (18.38%)                | 151 (54.32%)                |                |
| Seminal Vesicular Invasion |                             |                             | <0.0001        |
| absent                     | 1609 (93.60%)               | 188 (67.63%)                |                |
| present                    | 110 (6.40%)                 | 90 (32.37%)                 |                |
| Positive Surgical Margin   |                             |                             | <0.0001        |
| absent                     | 1613 (93.83%)               | 232 (83.45%)                |                |
| present                    | 106 (6.17%)                 | 46 (16.55%)                 |                |
| Lymphovascular invasion    |                             |                             | <0.0001        |

|                                  |               |              |
|----------------------------------|---------------|--------------|
| absent                           | 1645 (97.05%) | 226 (81.29%) |
| present                          | 50 (2.95%)    | 52 (18.71%)  |
| Final Pathology Stage            |               | <0.0001      |
| pT2                              | 468 (27.23%)  | 29 (10.43%)  |
| pT2a                             | 130 (7.56%)   | 9 (3.24%)    |
| pT2b                             | 8 (0.47%)     | 3 (1.08%)    |
| pT2c                             | 766 (44.56%)  | 71 (25.54%)  |
| pT3a                             | 240 (13.96%)  | 76 (27.34%)  |
| pT3b                             | 107 (6.22%)   | 90 (32.37%)  |
| Herniamesh_pelvic inflammation   |               | 0.4047       |
| No inflammation w/o hernia mesh  | 1037 (60.33%) | 159 (57.19%) |
| Inflammation without hernia mesh | 465 (27.05%)  | 86 (30.94%)  |
| Inflammation with hernia mesh    | 217 (12.62%)  | 33 (11.87%)  |

**Table S5.** Cox regression models for preoperative and postoperative predictors of BCR and PSA persistence after RP in 1997 patients.

| Covariates                 | Univariate         |         | Multivariable     |         |
|----------------------------|--------------------|---------|-------------------|---------|
|                            | HR (95% CI)        | p Value |                   |         |
| Age (years)                | 1.04(1.03, 1.06)   | <0.0001 |                   |         |
| PSA (ng/mL)                |                    |         |                   |         |
| <10 ng/mL                  | Ref                |         |                   |         |
| >10.1 ng/mL                | 3.85 (3.03, 4.90)  | <.0001  |                   |         |
| Race                       |                    |         |                   |         |
| African American           | 1.22 (0.75, 1.97)  | 0.4241  |                   |         |
| Caucasian                  | 0.72 (0.48, 1.08)  | 0.1083  |                   |         |
| Asian                      | 0.92 (0.50, 1.69)  | 0.7870  |                   |         |
| Others                     | Ref                |         |                   |         |
| MRI Prostate Volume (mL)   | 1.002 (0.99, 1.01) | 0.2334  |                   |         |
| Pelvic Inflammation        |                    |         |                   |         |
| Low (0,1)                  | Ref                |         |                   |         |
| High (2,3)                 | 1.48(1.16, 1.89)   | 0.0014  | 1.29 (1.01, 1.64) | 0.0433  |
| MRI ECE                    |                    |         |                   |         |
| Absent                     | Ref                |         |                   |         |
| present                    | 2.45 (1.93, 3.09)  | <.0001  |                   |         |
| MRI PI-RADS                |                    |         |                   |         |
| 1/2/3                      | Ref                |         |                   |         |
| 4/5                        | 2.34 (1.66, 3.32)  | <0.0001 |                   |         |
| Biopsy Gleason Grade Group |                    |         |                   |         |
| 1/2                        | Ref                |         |                   |         |
| 3/4/5                      | 4.93 (3.75, 6.49)  | <.0001  |                   |         |
| Path Gleason Grade group   |                    |         |                   |         |
| 1,2                        | Ref                |         |                   |         |
| 3,4,5                      | 6.45 (4.91, 8.46)  | <.0001  |                   |         |
| Positive surgical margin   |                    |         |                   |         |
| Absent                     | Ref                |         |                   |         |
| Present                    | 2.41 (1.76, 3.32)  | <.0001  | 1.40 (1.01, 1.94) | 0.0454  |
| Pathology Stage            |                    |         |                   |         |
| pT2                        | Ref                |         |                   |         |
| pT3                        | 4.25 (3.34, 5.4)   | <0.0001 | 3.94 (3.07, 5.05) | <0.0001 |
| Lymph Node invasion        |                    |         |                   |         |
| Absent                     | Ref                |         |                   |         |
| Present                    | 4.48 (3.31, 6.07)  | <.0001  |                   |         |
| SVI                        |                    |         |                   |         |
| Absent                     | Ref                |         |                   |         |
| Present                    | 4.37 (3.39, 5.62)  | <.0001  |                   |         |

|         |                   |        |
|---------|-------------------|--------|
| EPE     |                   |        |
| Absent  | Ref               |        |
| Present | 3.84 (3.03, 4.86) | <.0001 |

**Table S6.** Cox regression models for predictors including pT3 Stage, pathology stage and pelvic inflammation for predicting BCR after RP in 1997 patients.

| Covariates          | HR (95 % CI)      | <i>p</i> Value |
|---------------------|-------------------|----------------|
| Pelvic Inflammation |                   |                |
| 0,1 (low)           |                   |                |
| 2,3 (high)          | 1.32 (1.03, 1.68) | 0.0274         |
| PSA                 |                   |                |
| <10 ng/mL           |                   |                |
| >10.1 ng/mL         | 2.81 (2.19, 3.60) | <0.0001        |
| Pathology Stage     |                   |                |
| pT2                 |                   |                |
| pT3                 | 3.36 (2.62, 4.30) | <0.0001        |

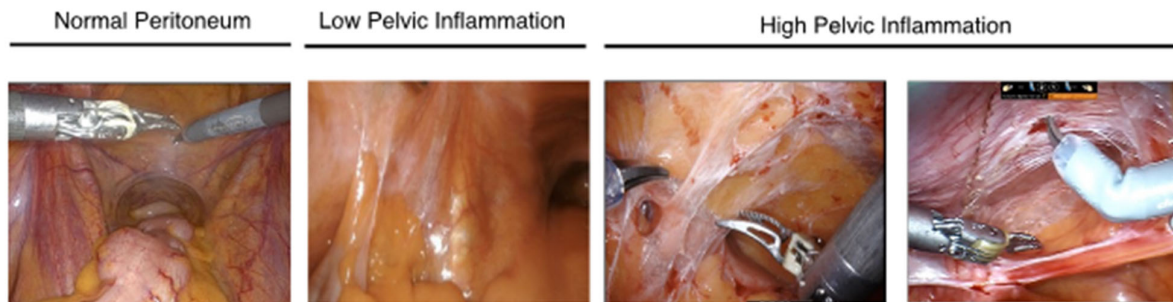

**Figure S1.** Pelvic Inflammation (VISUAL GRADING).

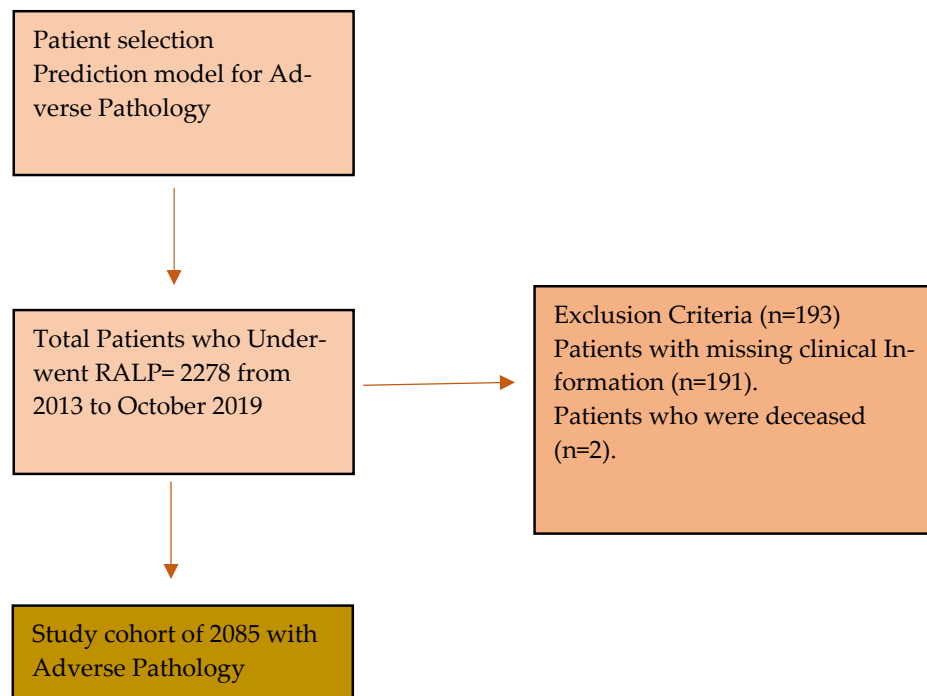

**Figure S2.** CONSORT flow diagram of study cohort for Adverse Pathology endpoint

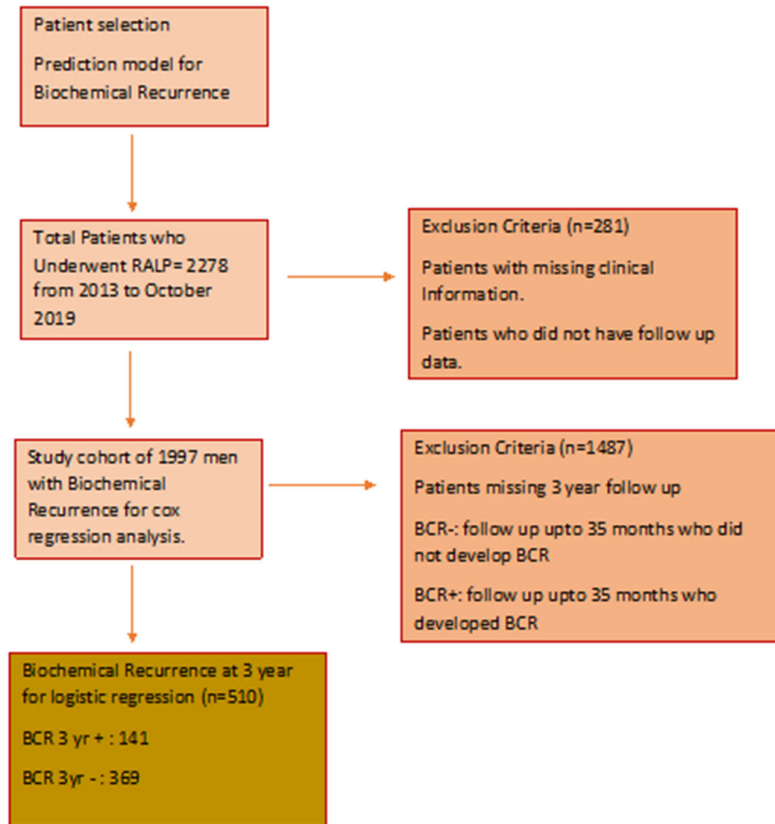

**Figure S3.** CONSORT flow diagram of study cohort for Biochemical Recurrence and PSA Persistence.

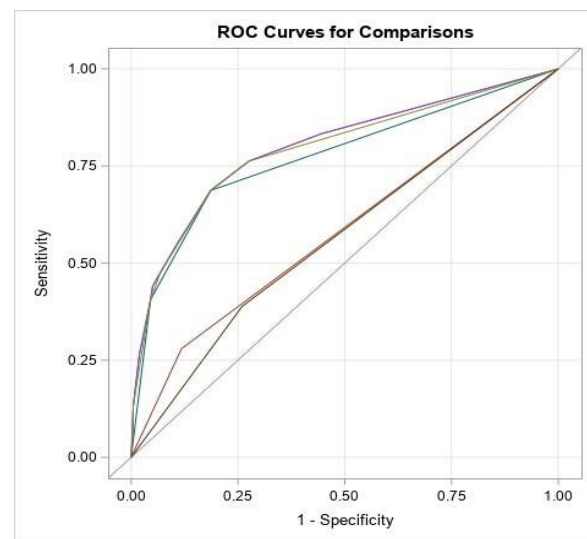

| ROC Contrast Estimation and Testing Results by Row                     |          |                |                            |          |            |
|------------------------------------------------------------------------|----------|----------------|----------------------------|----------|------------|
| Contrast                                                               | Estimate | Standard Error | 95% Wald Confidence Limits |          | Chi-Square |
| model without inflammation- model with inflammation and without hernia | -0.00892 | 0.00371        | -0.0162                    | -0.00165 | 5.7774     |
|                                                                        |          |                |                            |          | Pr > ChiSq |

**Figure S4.** Area under receiver operating characteristics for prediction of Adverse Pathology in subgroup considering pelvic inflammation without hernia mesh. <sup>a</sup> Under the nonparametric assumption. <sup>b</sup> Null hypothesis: true area= 0.05

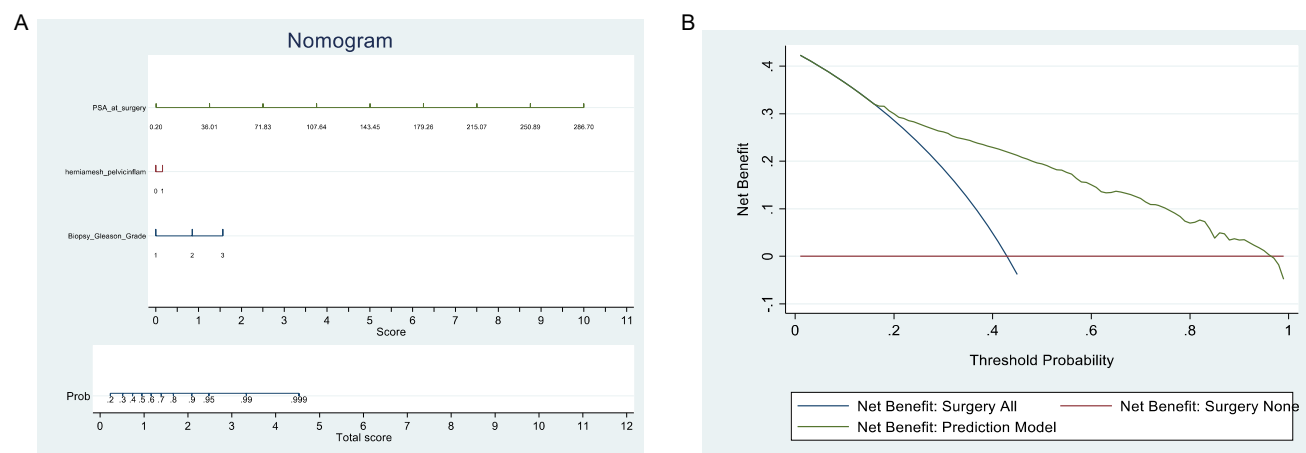

**Figure S5. (A).** Nomogram built for the prediction of Adverse Pathology in the subgroup cohort of 1858 cases. **(B).** Decision curve analysis for predicting AP using prediction model based on subgroup analysis. The unit is the benefit associated with one PCa patient duly undergoing surgery.

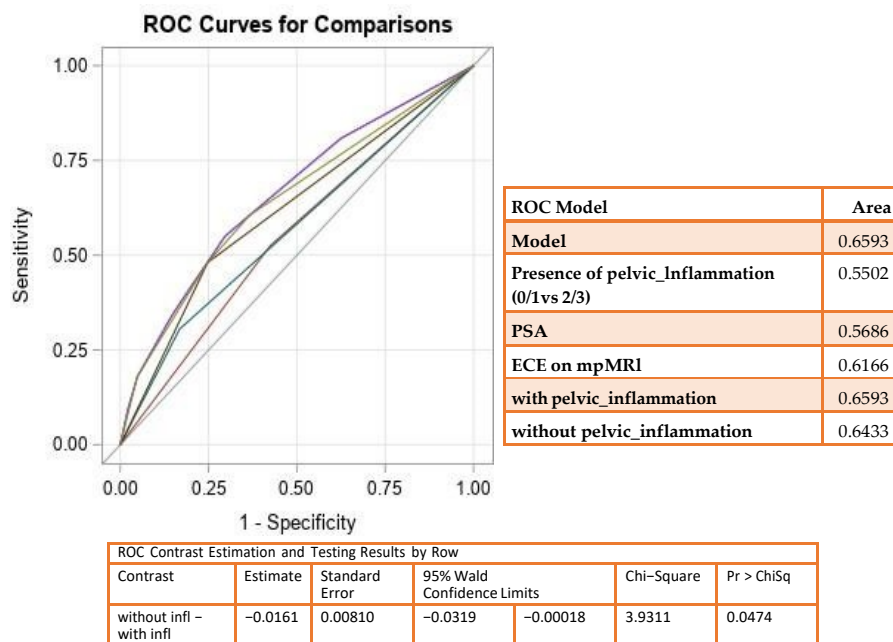

**Figure S6.** Area under receiver operating characteristics for prediction of Adverse Pathology considering pelvic inflammation in high biopsy Gleason grade group (3,4,5) in 881 patients.



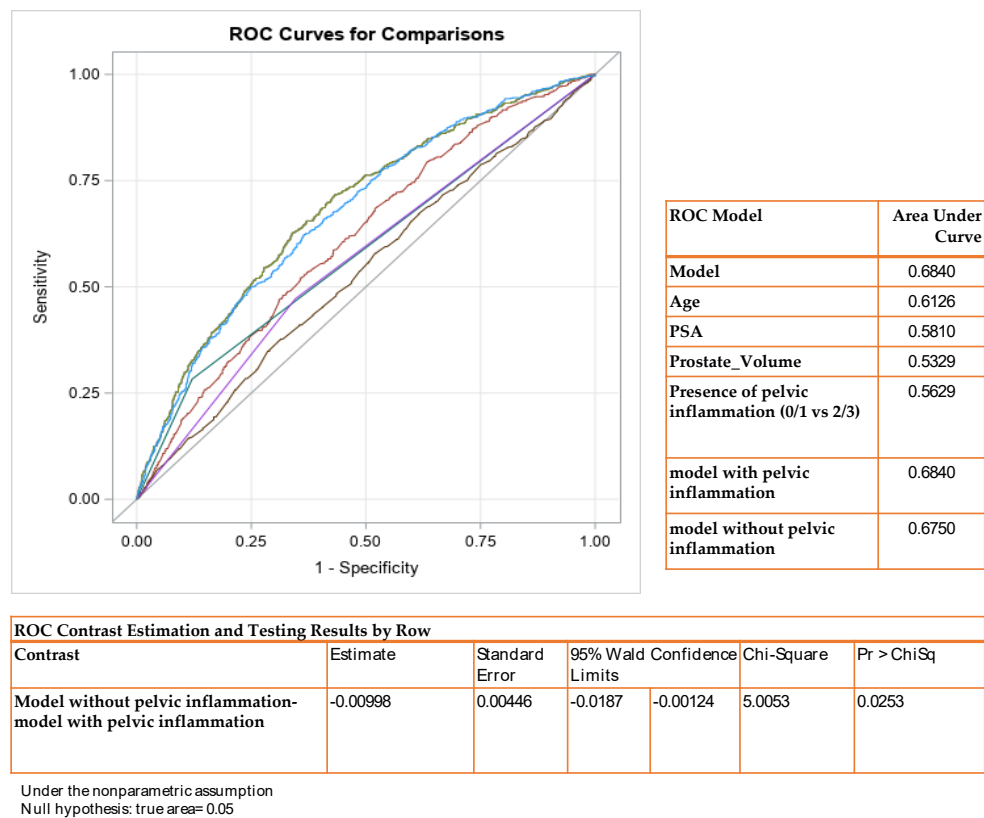

**Figure S7.** Area under receiver operating characteristics for prediction of Adverse Pathology considering pelvic inflammation

| Tine after surgery (months) | 0    | 20  | 40  | 60 | 80 |
|-----------------------------|------|-----|-----|----|----|
| Low Pelvic Inflammation     | 1196 | 493 | 221 | 56 | 1  |
| High Pelvic Inflammation    | 801  | 263 | 59  | 7  | 0  |

**Figure S8.** Risk Table: Numbers of survival probability of persons at risk at the beginning of the period of fol-low-up after Radical Prostatectomy by pelvic inflammation

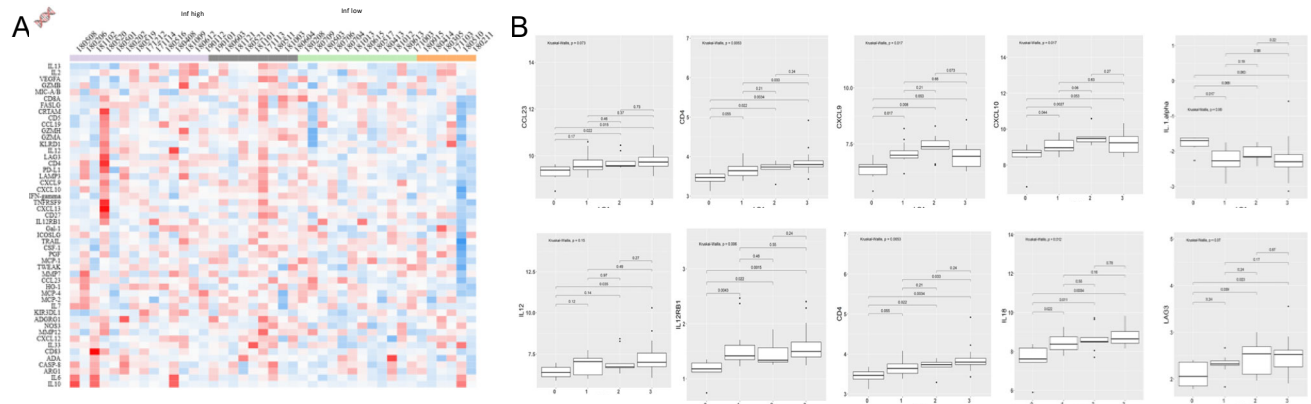

**Figure S9.** (A). Levels of 92 immune-oncology markers were evaluated in the serum of PCa patients with or without pelvic inflammation using O-link and heat map of differentially expressed genes between the inflammation groups is shown ( $p < 0.05$ ). (B). Proteins/cytokines differentially expressed in different pelvic inflammation groups; Pelvic inflammation score: 0-3

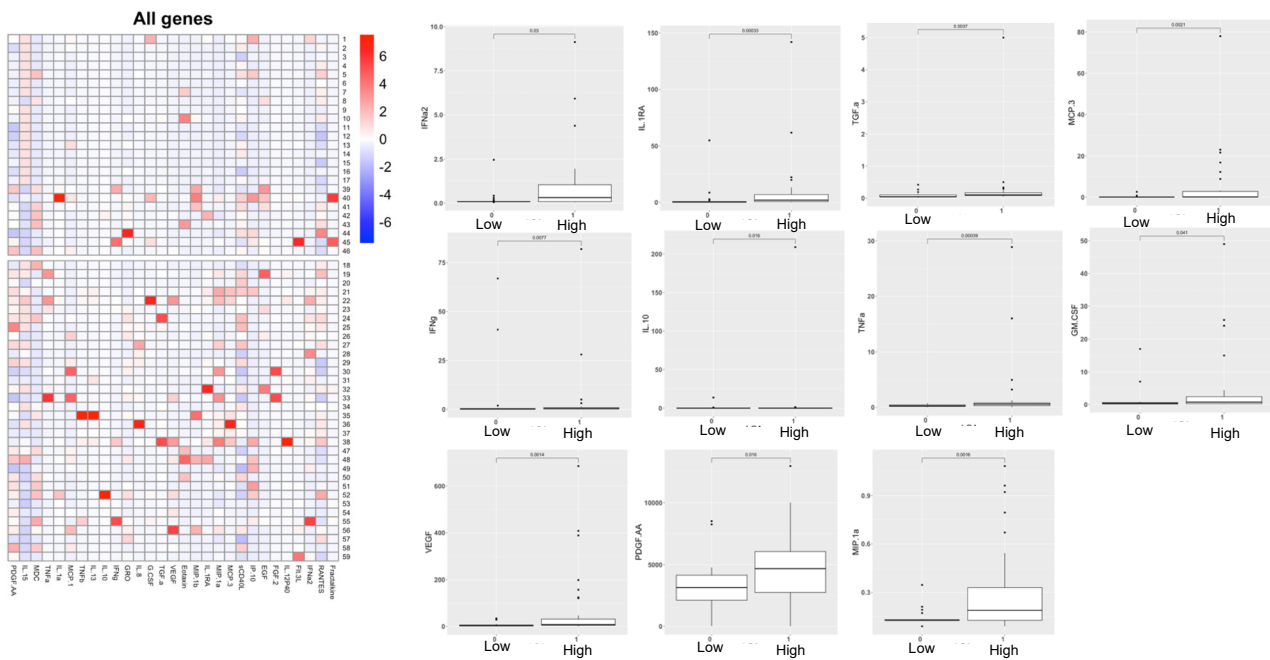

**Figure S10.** Proteins/cytokines differentially expressed in different pelvic inflammation groups; Pelvic inflammation score: 0-3



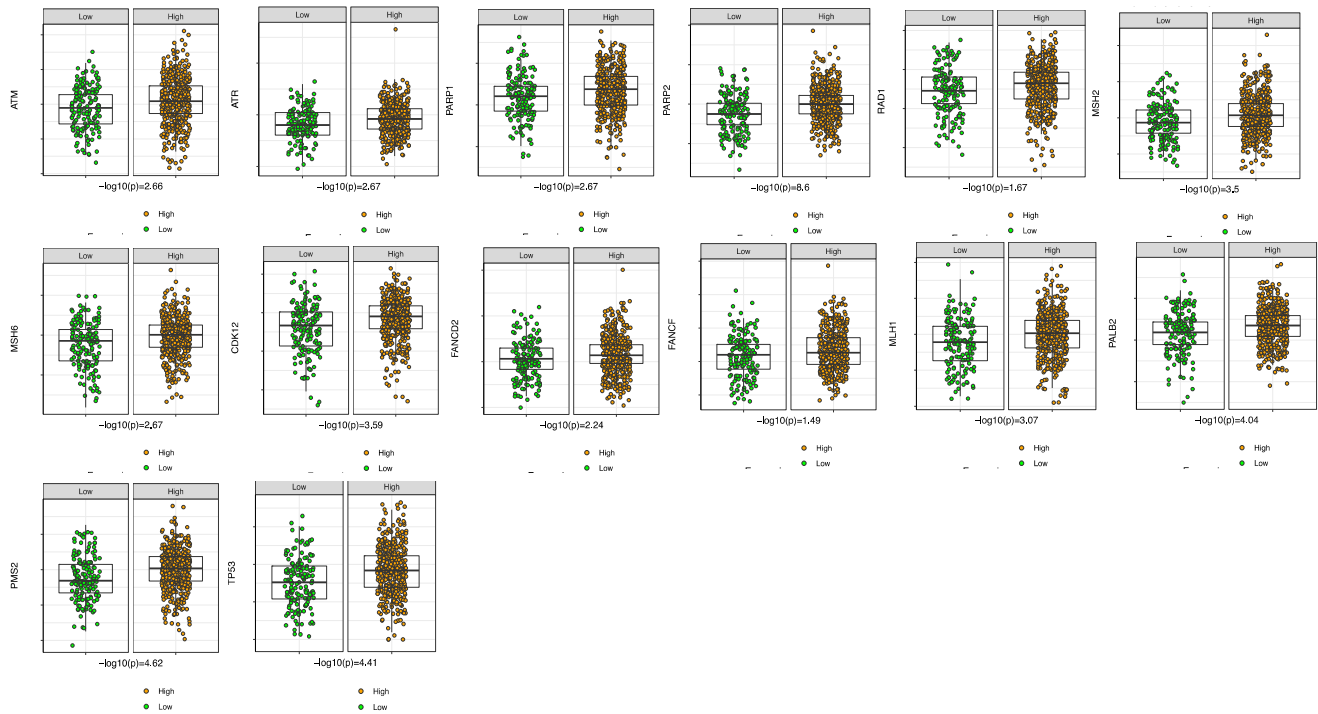

**Figure S12.** Prostate cancer patients with pelvic inflammation demonstrate elevated levels of DDR genes. DDR genes are significantly upregulated in prostate cancer from patients with high pelvic inflammation

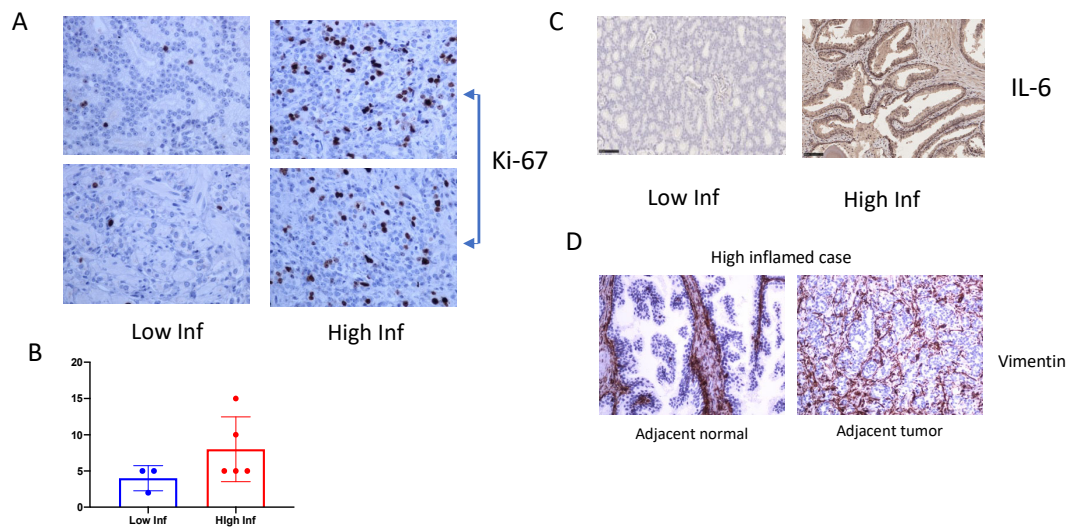

**Figure S13.** Prostate tissues of prostate cancer patients with high pelvic inflammation shows increased proliferation and expression of proinflammatory cytokines. (A,B). Ki-67 staining in PCa tissue from patients with low and high pelvic inflammation. (C). IL-6 expression in prostate cancer tissues of patients with low and high inflammation. (D). Vimentin expression in prostate tissue of prostate cancer tissue patents with high pelvic inflammation. Magnification 20 $\times$ .
